# Supplementary material for: Naive infection predicts reservoir diversity and is a formidable hurdle to HIV eradication
Source: JCI journal article supplement (doi:10.1172/jci.insight.150794), 2021-07-06
Supplement: sd1 [file 1]

## **Naive infection predicts reservoir diversity and is a formidable hurdle to HIV eradication**

Marilia Rita Pinzone<sup>1</sup>, Sam Weissman<sup>1</sup>, Alexander O Pasternak<sup>2</sup>, Ryan Zurakowski<sup>3</sup>, Stephen Migueles<sup>4</sup>, Una O'Doherty

## Supplementary data

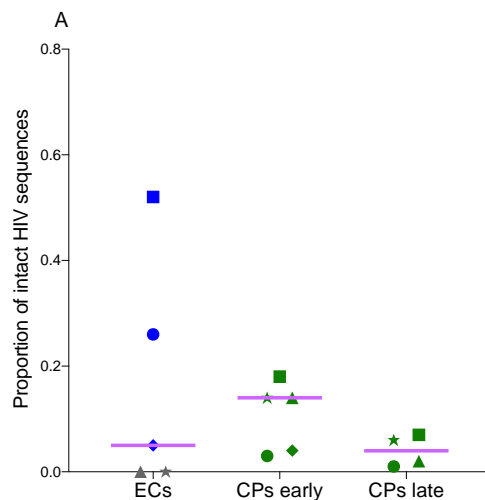

**Figure S1. Proportion of intact HIV sequences in ECs and CPs.** In the EC group, we did not detect any intact HIV in CD4 T cells from two participants (grey symbols). In the remaining three ECs, the fraction of intact HIV greatly varied ranging between 5 and 52%. For one EC (blue square), about half of the reservoir was represented by intact HIV sequences. The vast majority of these intact sequences were repeated sequences and belonged to two largely expanded clones. These findings are consistent with clonal expansion of infected cells containing intact HIV. In fact, given the high error rate of HIV reverse transcriptase, we would not expect to retrieve the same identical sequence if these results were due to ongoing replication. In CPs, the fraction of intact HIV in CD4 T cells ranged between 3 and 18% at the early timepoint after ART initiation (N=5) and between 1 and 7% at the late timepoint (N=4), consistent with decay of intact HIV over time on ART.

Abbreviations: ART: antiretroviral therapy; CP: chronic progressor; EC: elite controller

**Table S1. Additional virological and immunological parameters for the chronic progressors studied at two time points**

| ID  | Apheresis            | ART regimen       | HIV<br>RNA | CD4  | CD4/CD8 ratio |
|-----|----------------------|-------------------|------------|------|---------------|
|     | collection<br>(year) |                   |            |      |               |
| CP1 | 2015                 | ABC DTG 3TC       | <20        | 1348 | 0.96          |
|     | 2017                 | DTG RPV           | <20        | 971  | 0.90          |
| CP2 | 2015                 | TDF/FTC RPV       | <20        | 871  | 0.65          |
|     | 2018                 | TAF/FTC/EVG/COBI  | <20        | 870  | 0.72          |
| CP3 | 2008                 | ATV/r TDF/FTC     | <50        | 617  | ---           |
|     | 2015                 | ATV/r TDF/FTC     | <20        | 718  | 1.0           |
| CP4 | 2007                 | ATV/r 3TC D4T     | <50        | 629  | ---           |
|     | 2015                 | ATV/r 3TC RAL     | <40        | 768  | 1.2           |
| CP5 | 2015                 | ATV/r TDF/FTC ABC | <20        | 268  | 0.52          |

Abbreviations: ABC: abacavir; ART: antiretroviral therapy; ATV: atazanavir; CP: chronic progressor; COBI: cobicistat; D4T: stavudine; DTG: dolutegravir; EVG: elvitegravir; FTC: emtricitabine; r: ritonavir; RAL: raltegravir; RPV: rilpivirine; TAF: tenofovir alafenamide; TDF: tenofovir disoproxil fumarate; 3TC: lamivudine

CD4 counts are presented as cells/ $\mu$ l, HIV RNA as copies/ml blood

**Table S2. Cellular subset contribution to total CD4 T cells and estimates of HIV DNA levels in each subset**

| ID  | Year | Subset contribution to total |                 |                 |                 | HIV DNA                    |                 |                 |                 |
|-----|------|------------------------------|-----------------|-----------------|-----------------|----------------------------|-----------------|-----------------|-----------------|
|     |      | CD4 (%)                      |                 |                 |                 | (copies per million cells) |                 |                 |                 |
|     |      | T <sub>N</sub>               | T <sub>CM</sub> | T <sub>TM</sub> | T <sub>EM</sub> | T <sub>N</sub>             | T <sub>CM</sub> | T <sub>TM</sub> | T <sub>EM</sub> |
| EC1 | 2009 | 37                           | 22              | 6.7             | 7.4             | 2.3                        | 12              | <2              | <2              |
| EC2 | 2009 | 33                           | 16              | 12              | 11              | 0.59                       | 3.9             | 52              | 11              |
| EC3 | 2007 | 23                           | 29              | 5.2             | 9.1             | 1.7                        | 50              | 46              | 32              |
| EC4 | 2017 | 18                           | 45              | 9.5             | 3.4             | 0.58                       | 77              | 35              | 14              |
| EC5 | 2002 | 7.0                          | 16              | 12              | 10              | 15                         | 106             | 351             | 1001            |
| CP1 | 2015 | 8.1                          | 21              | 11              | 30              | 8.9                        | 95              | 145             | 22              |
| CP1 | 2017 | 24                           | 21              | 7.0             | 20              | 6.9                        | 73              | 144             | 35              |
| CP2 | 2015 | 24                           | 19              | 11              | 13              | 19                         | 781             | 1725            | 1175            |
| CP2 | 2018 | 48                           | 21              | 3.9             | 5.7             | 12                         | 566             | 826             | 547             |
| CP3 | 2008 | 21                           | 14              | 7.8             | 12              | 655                        | 4581            | 4915            | 3694            |
| CP3 | 2015 | 23                           | 20              | 6.8             | 11              | 468                        | 2641            | 4383            | 3446            |
| CP4 | 2007 | 34                           | 9.4             | 4.0             | 1.0             | 1236                       | 3719            | 2601            | 3316            |
| CP4 | 2015 | 44                           | 16              | 4.5             | 1.7             | 904                        | 2048            | 1446            | 740             |
| CP5 | 2015 | 31                           | 21              | 4.8             | 5.5             | 1242                       | 6473            | 2263            | 2096            |

The sum of the percentage contributed by each subset is less than 100% because we excluded CD45RA<sup>dim</sup> and T<sub>EMRA</sub> cells as well as cells that were near the boundary of the sorting gates

Abbreviations: CP: chronic progressor; EC: elite controller; T<sub>N</sub>: Naive CD4 T cells; T<sub>CM</sub>: Central memory CD4 T cells; T<sub>TM</sub>: Transitional memory CD4 T cells; T<sub>EM</sub>: Effector memory CD4 T cells; T<sub>EMRA</sub>: terminally differentiated effector memory T cells

**Table S3. Correlation between the levels of HIV DNA in cellular subsets and the fraction of unique sequences**

| Cellular subset | Unique proviral sequences |      |
|-----------------|---------------------------|------|
|                 | r                         | p    |
| T <sub>N</sub>  | 0.75                      | 0.02 |
| T <sub>CM</sub> | 0.61                      | 0.07 |
| T <sub>TM</sub> | 0.64                      | 0.06 |
| T <sub>EM</sub> | 0.62                      | 0.06 |

Abbreviations: T<sub>N</sub>: Naive CD4 T cells; T<sub>CM</sub>: Central memory CD4 T cells; T<sub>TM</sub>: Transitional memory CD4 T cells; T<sub>EM</sub>: Effector memory CD4 T cells
